# Supplementary material for: Senescent cells in 3D culture show suppressed senescence signatures
Source: Royal Society of Chemistry journal article supplement (doi:10.1039/d1bm00536g), 2021-01-01
Supplement: d1bm00536g3.pdf [file d1bm00536g3.pdf]

## Supplementary Information

### Senescent Cells in 3D Culture Show Suppressed Senescence Signatures

Parul Yadav<sup>1</sup>, Kaushik Chatterjee<sup>1,2\*</sup> and Deepak Kumar Saini<sup>1,3\*</sup>

<sup>1</sup>Centre for BioSystems Science and Engineering, Indian Institute of Science, C.V Raman Avenue, Bangalore, India 560012

<sup>2</sup>Department of Materials Engineering, Indian Institute of Science, C.V Raman Avenue, Bangalore, India 560012

<sup>3</sup>Department of Molecular Reproduction, Development and Genetics, C.V Raman Avenue, Indian Institute of Science, Bangalore, India 560012

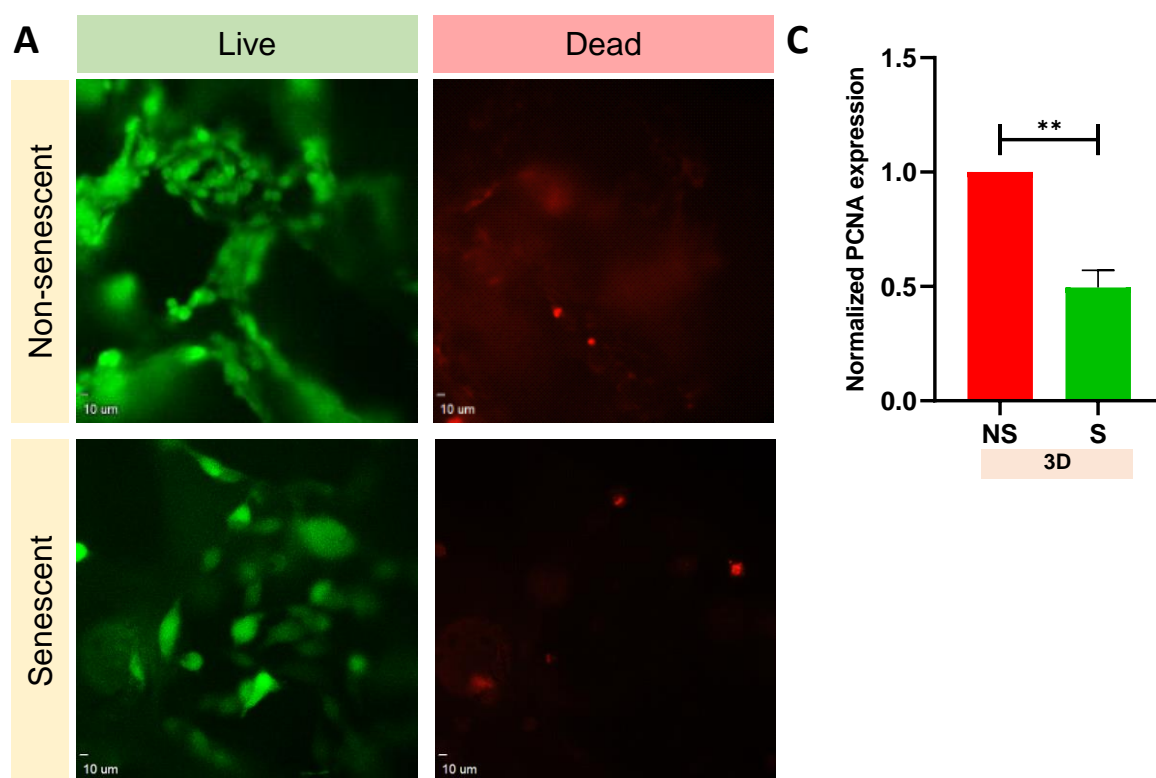

**Supplementary figure S1:** (A) Viability assessment using live stained by Calcein-AM (green) and dead stained by EthD-1 (red) staining of senescent and non-senescent cells in the scaffold. Scale bars represent 10 μm. (B) Live cell imaging videos of non-senescent and senescent GFP- HeLa cells in scaffold. Scale bars represent 10 μm. (C) PCNA gene expression analysis for senescent and non-senescent cells in 3D scaffolds. Unpaired t test was performed. \*\* indicates  $p < 0.01$ .

Table S1: Details of antibody

| S. No. | Antibody                                                    | Company               | Dilution |
|--------|-------------------------------------------------------------|-----------------------|----------|
| 1      | Alexa Fluor 488 Phalloidin                                  | Invitrogen<br>A12379  | 1: 400   |
| 2      | Alexa Fluor 546 Phalloidin                                  | Invitrogen<br>A22283  | 1: 400   |
| 3      | Vimentin (D21H3)<br>Rabbit mAb                              | CST<br>5741           | 1: 100   |
| 4      | Goat anti-Rabbit IgG Secondary<br>Antibody, Alexa Fluor 488 | Invitrogen<br>A-11034 | 1:500    |

Table S2: Details of primers

| S. No. | Gene             | Sequence                        |
|--------|------------------|---------------------------------|
| 1      | P21 FW           | 5'-GGAAGACCATGTGGACCTGT -3'     |
| 2      | P21 RW           | 5'-TAGGGCTTCCTCTTGGAGAA -3'     |
| 3      | HIF1 $\alpha$ FW | 5'- GAAGTGGCAACTGATGAGCA -3'    |
| 4      | HIF1 $\alpha$ RW | 5'-GCGCGAACGACAAGAAA -3'        |
| 5      | IL6 FW           | 5'- AGACAGCCACTCACCTCTTCAG -3'  |
| 6      | IL6 RW           | 5'- TTCTGCCAGTGCCTCTTTGCTG -3'  |
| 7      | IL8 FW           | 5'- GAGAGTGATTGAGAGTGGACCAC -3' |
| 8      | IL8 RW           | 5'- CACAACCCTCTGCACCCAGTTT -3'  |
| 9      | NF $\kappa$ B FW | 5'- GCAGCACTACTTCTTGACCACC -3'  |
| 10     | NF $\kappa$ B RW | 5'- TCTGCTCCTGAGCATTGACGTC -3'  |
| 11     | PCNA FW          | 5'-AGGAGGAAGCTGTTACCATAGAG -3'  |
| 12     | PCNA RW          | 5'-AAGTGTCCCATATCCGCAAT -3'     |
| 13     | COL1A1 FW        | 5'-GATTCCCTGGACCTAAAGGTGC-3'    |
| 14     | COL1A1 RW        | 5'-AGCCTCTCCATCTTTGCCAGCA-3'    |
| 15     | FN1 FW           | 5'-ACAACACCGAGGTGACTGAGAC-3'    |
| 16     | FN1 RW           | 5'-GGACACAACGATGCTTCCTGAG-3'    |
| 17     | GAPDH FW         | 5'- GAGTCAACGGATTTGGTCGT -3'    |
| 18     | GAPDH RW         | 5'- GACAAGCTTCCCGTTCTCAG -3'    |

**Video files:** Live-cell imaging videos of non-senescent (video V1) and senescent (video V2) GFP-HeLa cells in the scaffold. Imaging was performed for 24 h after three days of seeding. Scale bars represent 10  $\mu\text{m}$ .
